# Supplementary material for: The dynamic balance of import and export of zinc in Escherichia coli suggests a heterogeneous population response to stress
Source: PubMed Central journal article supplement (PMC4424684; doi:10.1098/rsif.2015.0069), 2015-05-06

**LB**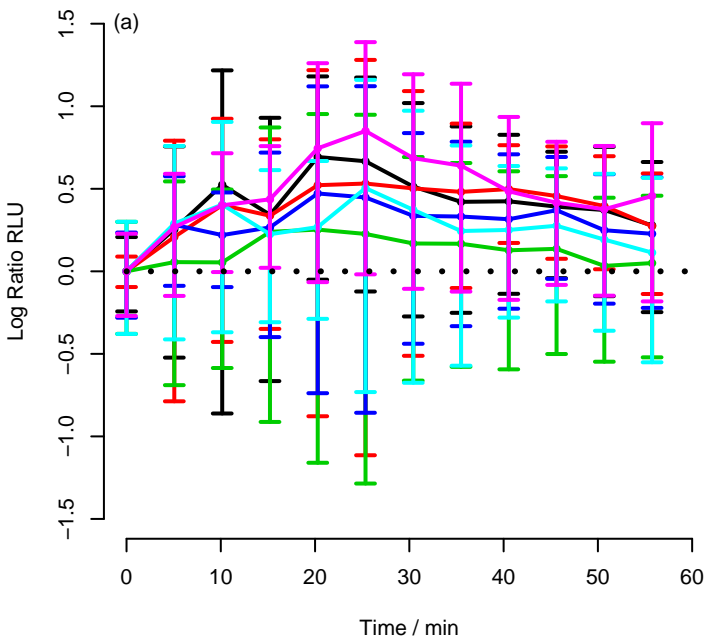**LB + 100uM Zn**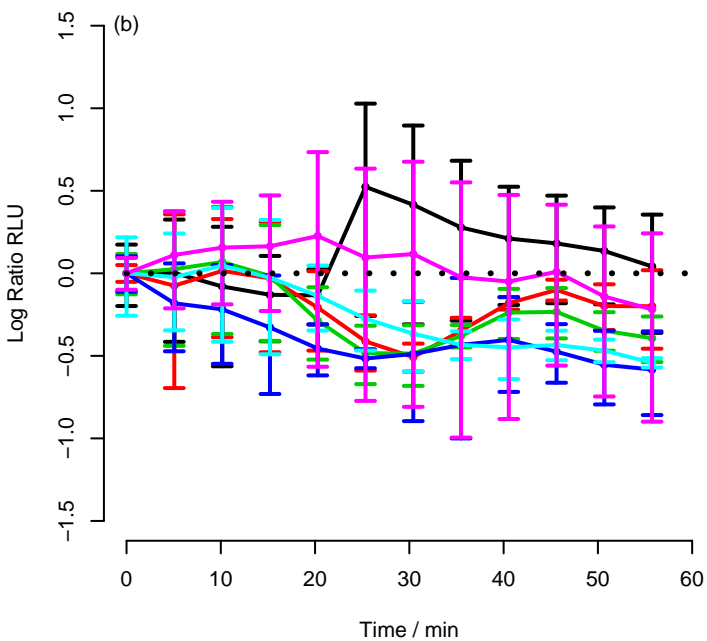**LB + 200uM Zn**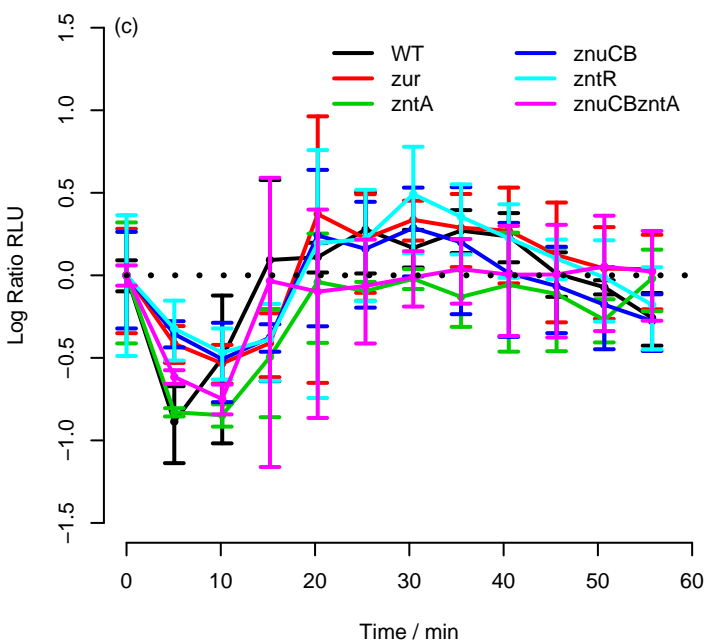

Supplement: rsif20150069supp1.pdf [file rsif20150069supp1.pdf]
