# Supplementary material for: The dynamic balance of import and export of zinc in Escherichia coli suggests a heterogeneous population response to stress
Source: PubMed Central journal article supplement (PMC4424684; doi:10.1098/rsif.2015.0069), 2015-05-06

**znuC( $\Delta$ zur)**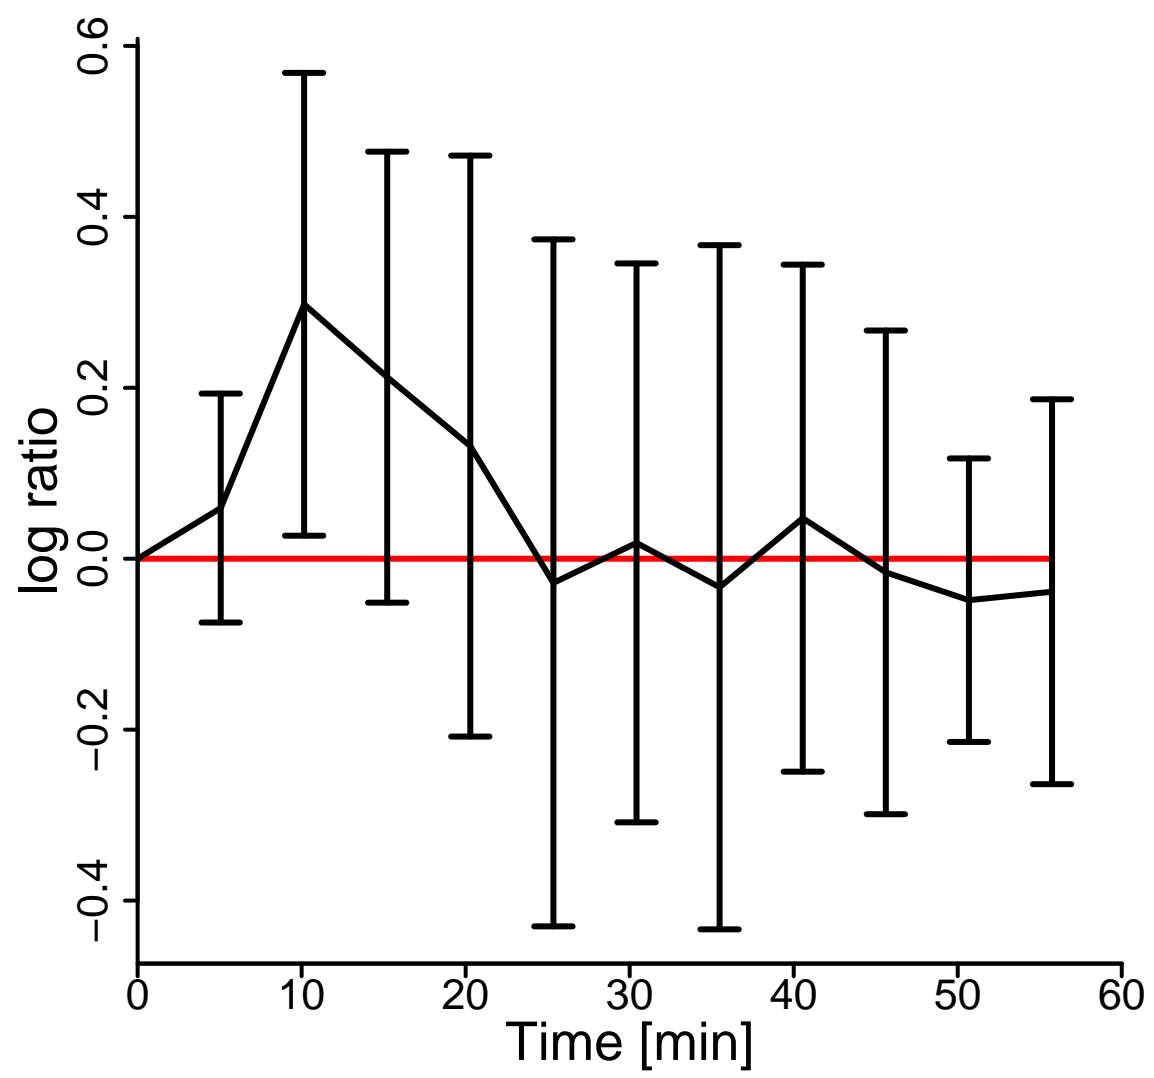**znuC( $\Delta$ zntR)**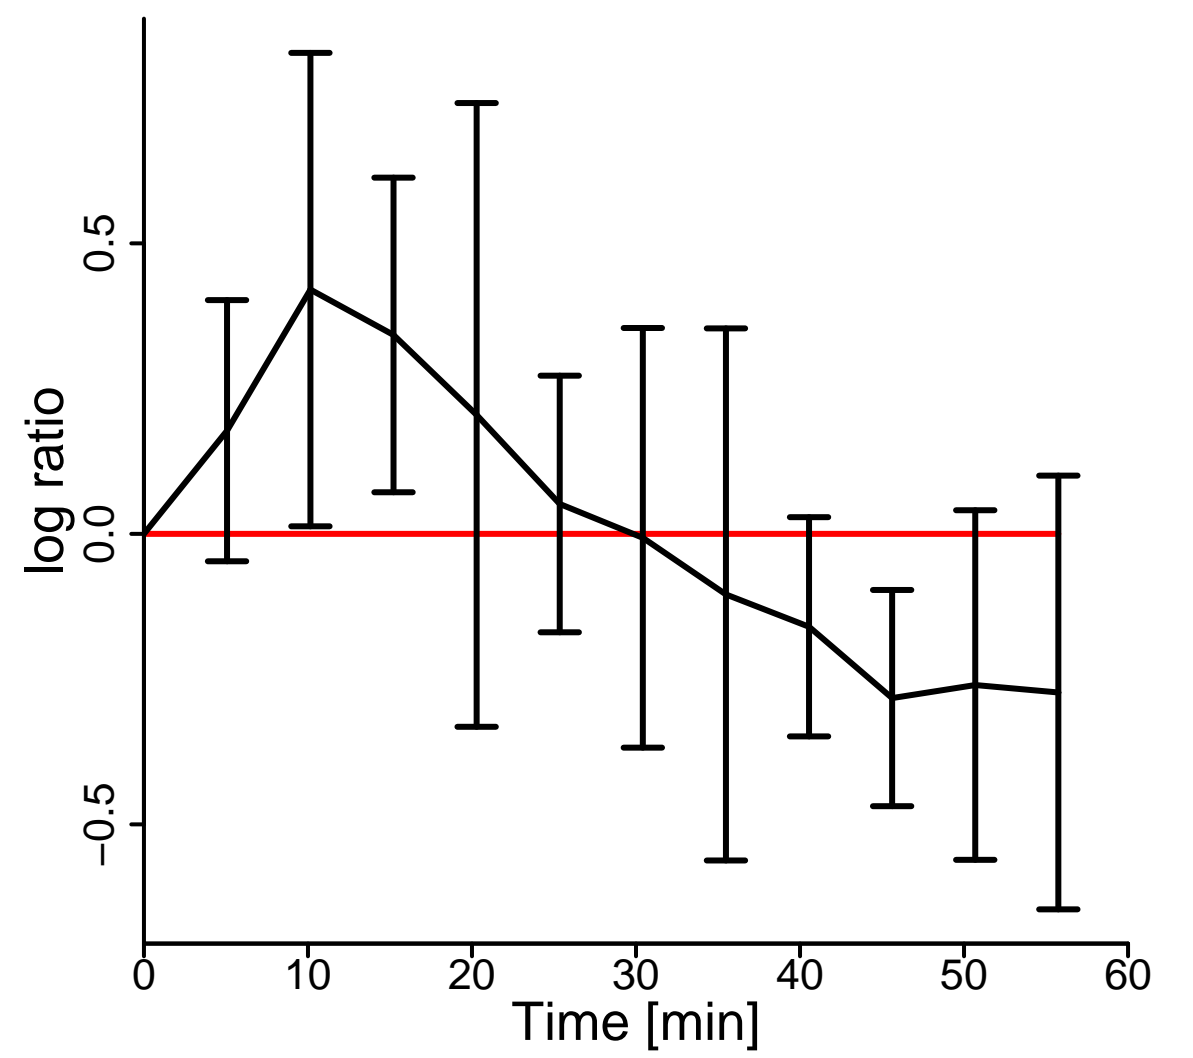**znuC( $\Delta$ znuCB)**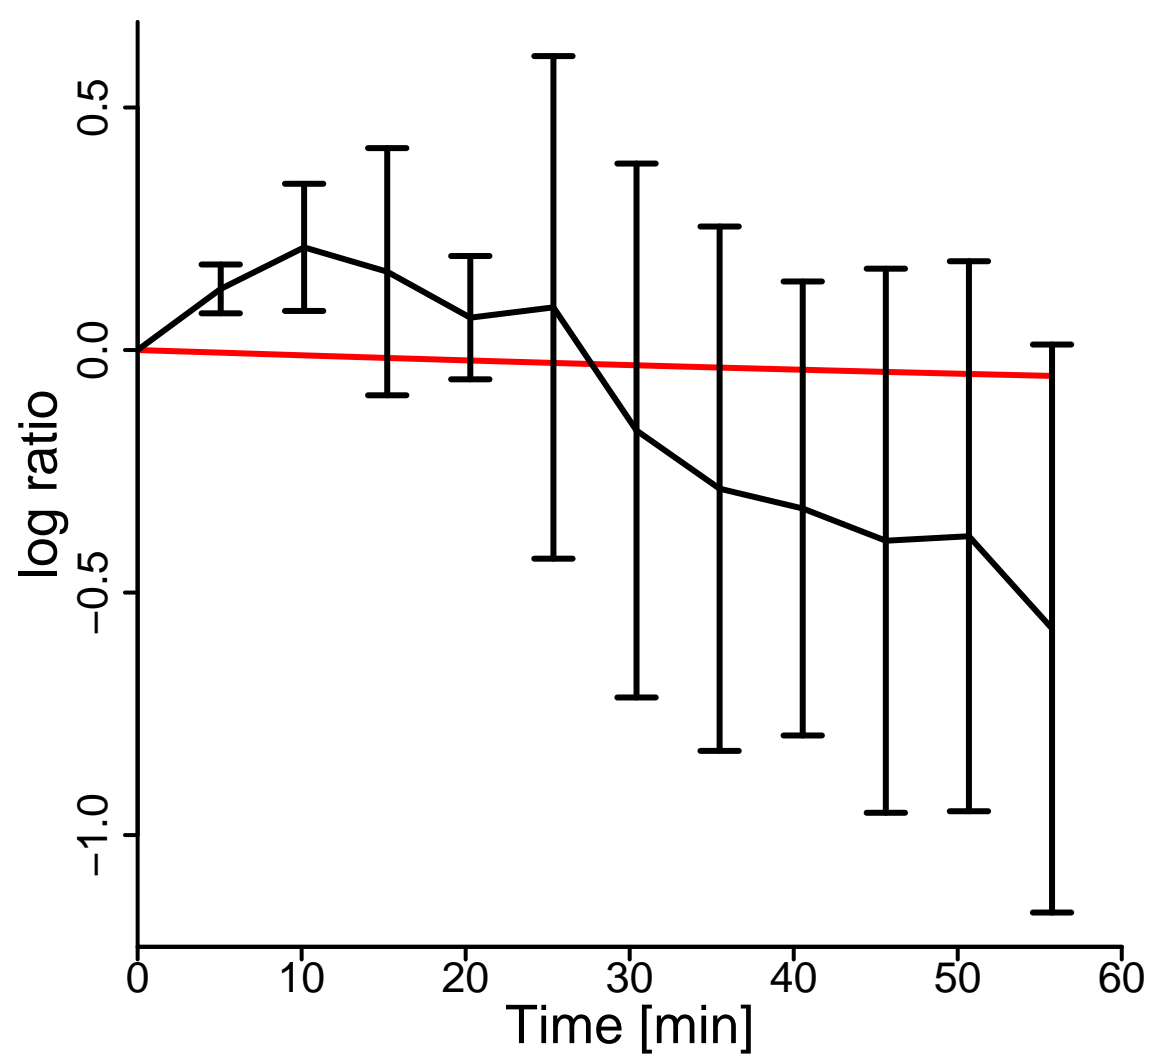**znuC( $\Delta$ znuCBzntA)**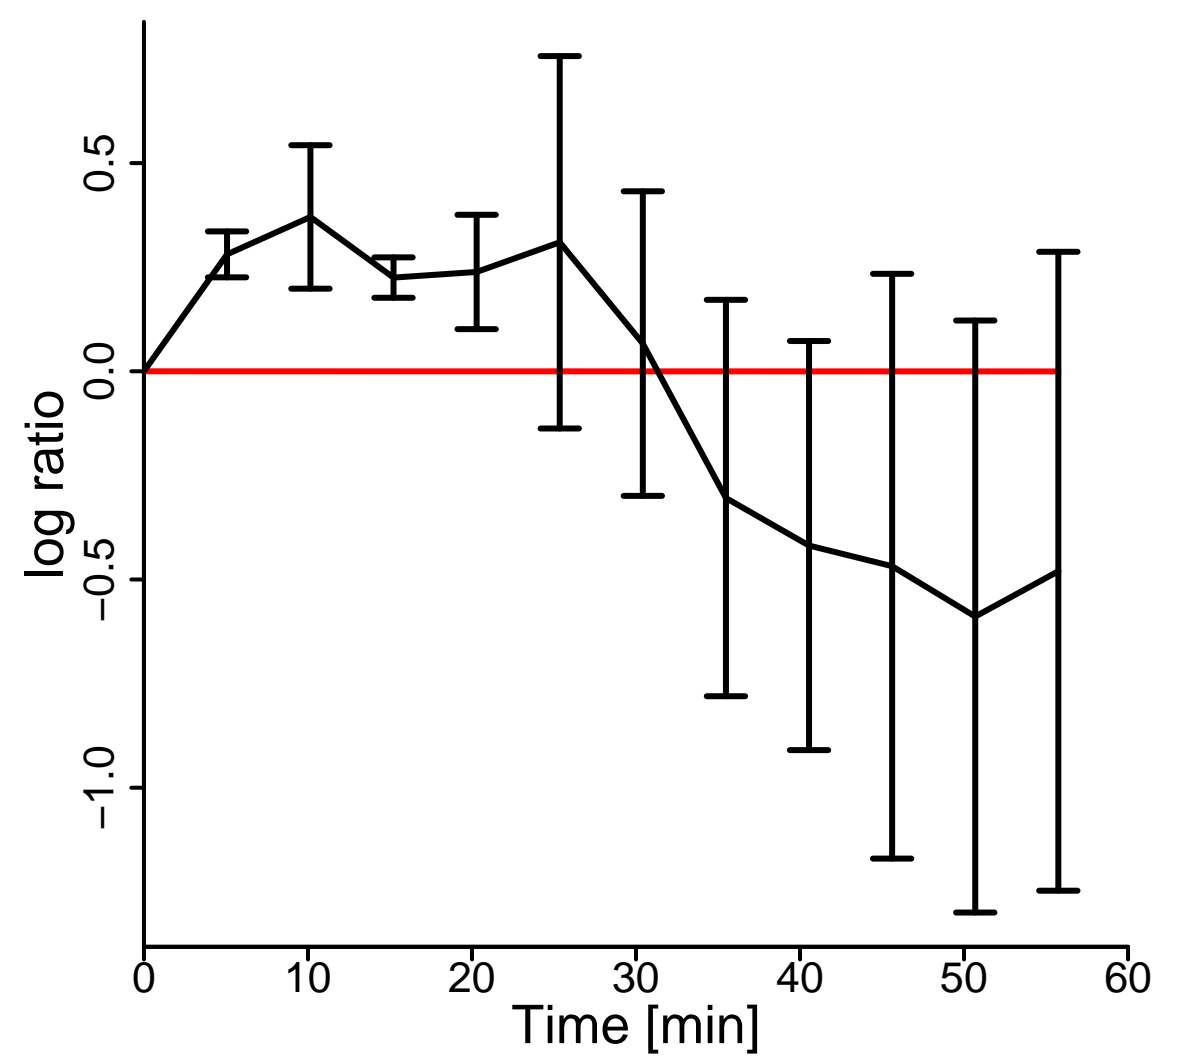**zntA( $\Delta$ zur)**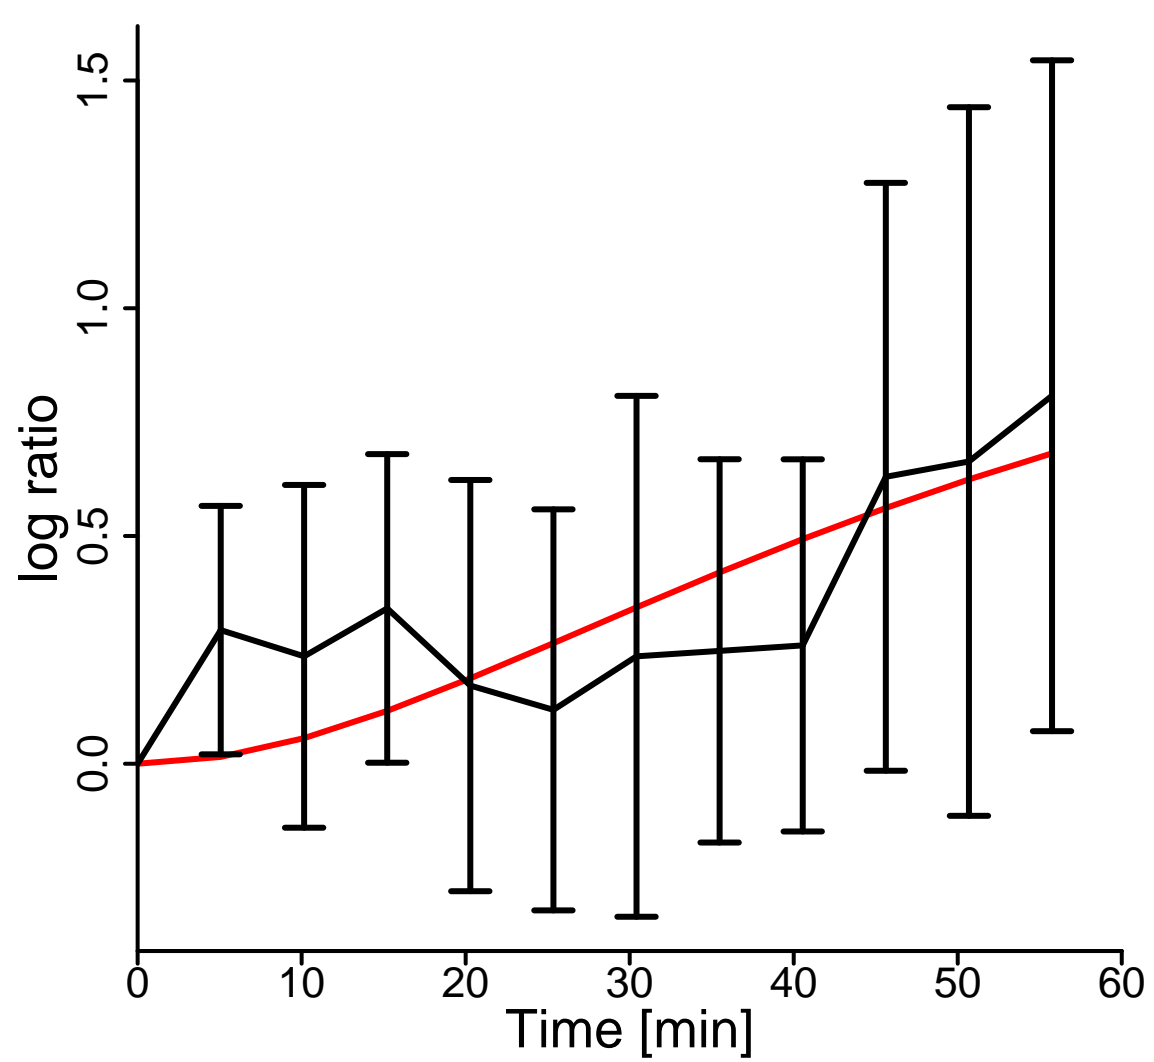**zntA( $\Delta$ zntR)**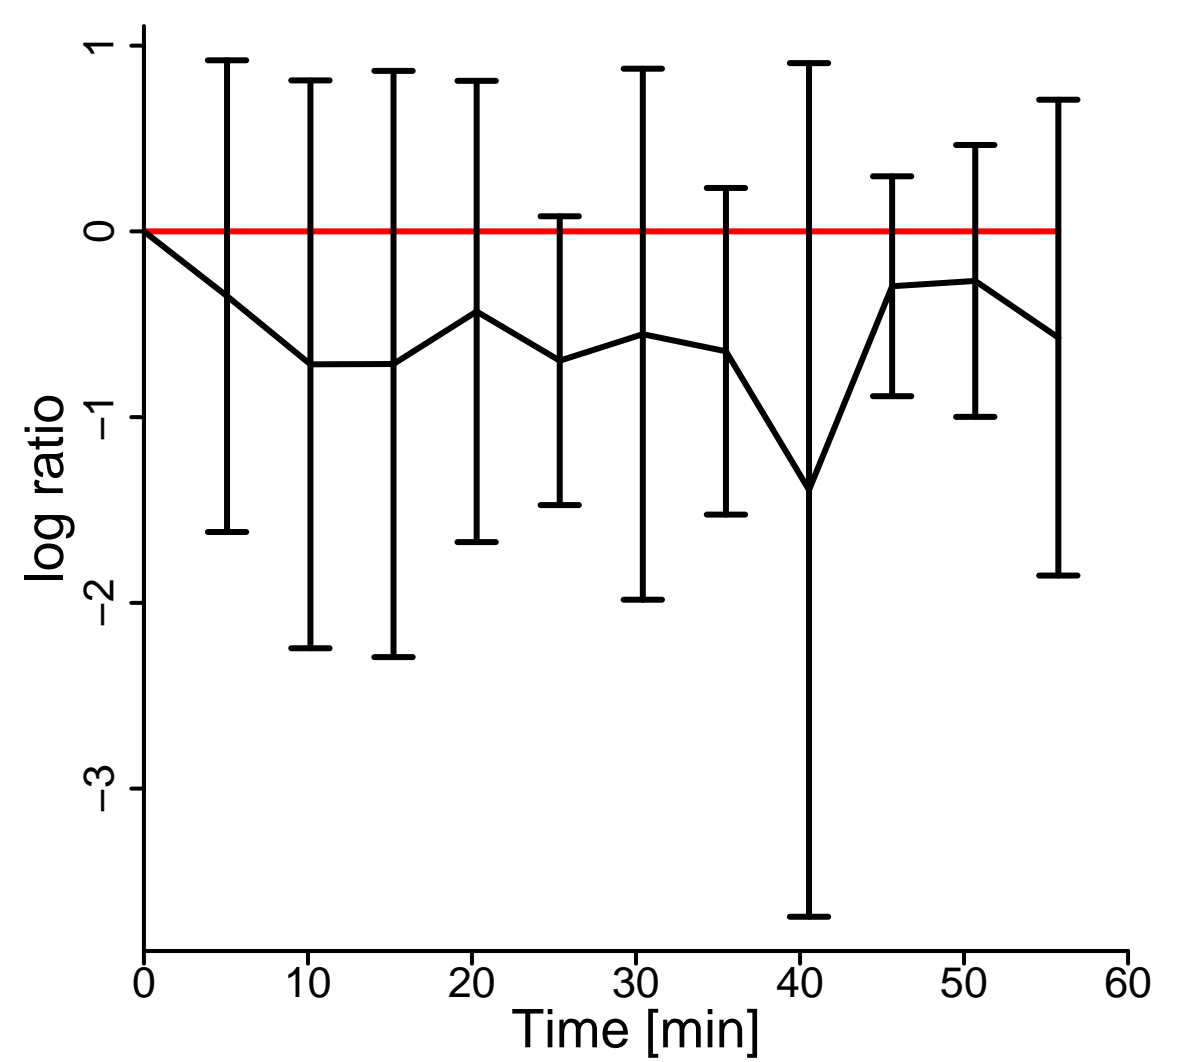

Supplement: rsif20150069supp4.pdf [file rsif20150069supp4.pdf]
